# Supplementary material for: Essential oil ofSchisandra chinensisameliorates cognitive decline in mice by alleviating inflammation
Source: Royal Society of Chemistry journal article supplement (doi:10.1039/c9fo00058e), 2019-01-01
Supplement: c9fo00058e1.pdf [file c9fo00058e1.pdf]

## Supporting information

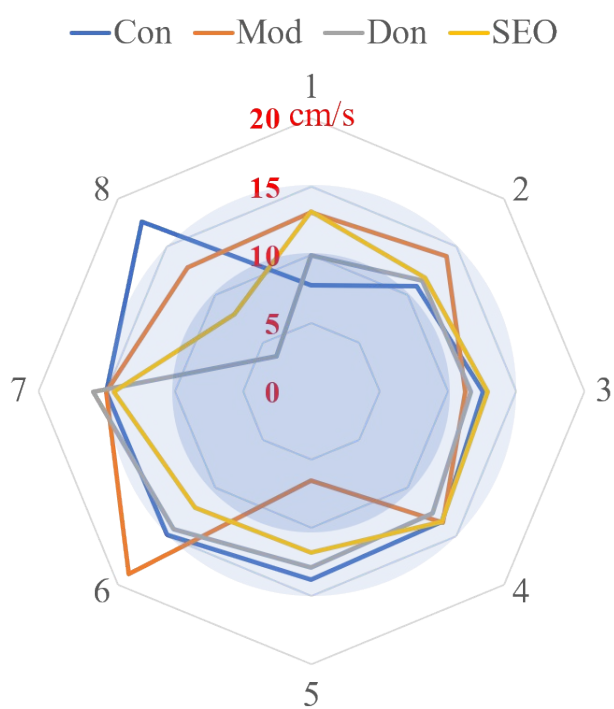

Fig. S1. The average swimming speed of mice. 8 mice of each group were tested. The results showed that the swimming speed of 6 mice in each group was relatively similar between 10 cm/s and 15 cm/s.

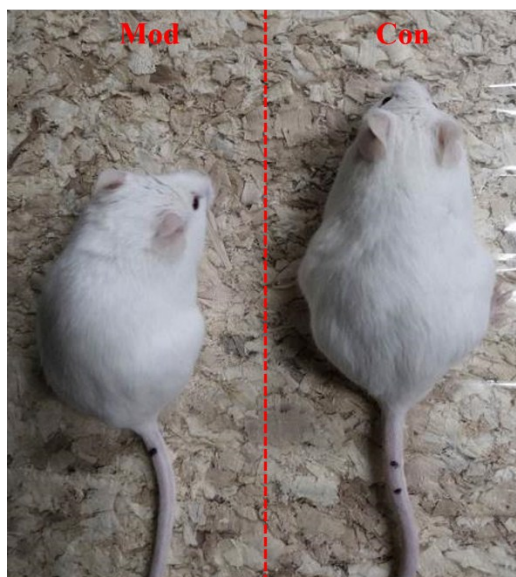

Fig. S2. The mice in Con group and Mod group on the second day of LPS injected.
